# Supplementary material for: Tau seeding activity in skin biopsy differentiates tauopathies from synucleinopathies
Source: Springer Nature journal article supplement (doi:10.1038/s41531-024-00728-9), 2024-06-15
Supplement: MOESM1 [file 41531_2024_728_MOESM1_ESM-1.pdf]

## SUPPLEMENTARY MATERIAL

### **Tau seeding activity in skin biopsy differentiates tauopathies from synucleinopathies**

Ilaria Linda Dellarole M.Sc.<sup>1\*</sup>, Elena Vacchi Ph.D.<sup>2,3\*</sup>, Inigo Ruiz-Barrio M.D.<sup>4</sup>, Sandra Pinton M.Sc.<sup>2,5</sup>, Andrea Raimondi, Ph.D.<sup>6</sup>, Stefania Rossi M.Sc.<sup>5</sup>, Sara Morandi M.D.<sup>5</sup>, Giovanni Bianco M.D.<sup>5</sup>, Merve Begum Bacinoglu M.Sc.<sup>1</sup>, Annalisa Lombardo M.Sc.<sup>1</sup>, Luigi Celauro Ph.D.<sup>7</sup>, Claudio Staedler M.D.<sup>5</sup>, Salvatore Galati M.D. Ph.D.<sup>3,5</sup>, Javier Pagonabarraga M.D. Ph.D.<sup>4</sup>, Jaime Kulisevsky M.D. Ph.D.<sup>4</sup>, Giuseppe Legname Ph.D.<sup>7</sup>, Claudio Gobbi M.D.<sup>3,5,8</sup>, Alain Kaelin-Lang MD Ph.D.<sup>3,5,9</sup>, Fabio Moda Ph.D.<sup>1#</sup>, Giorgia Melli M.D. Ph.D.<sup>2,3,5#</sup>

#### **Author affiliations:**

1. Division of Neurology 5 and Neuropathology, Fondazione IRCCS Istituto Neurologico Carlo Besta, Milan, Italy.
2. Neurodegenerative Diseases Group, Laboratory for Translational Research, Ente Ospedaliero Cantonale, Bellinzona, Switzerland.
3. Faculty of Biomedical Sciences, Università della Svizzera Italiana, Lugano, Switzerland.
4. Movement Disorders Unit, Neurology Department, Hospital de la Santa Creu i Sant Pau, Barcelona, Spain.
5. Neurology Department, Neurocenter of Southern Switzerland, Ente Ospedaliero Cantonale, Lugano, Switzerland.
6. Institute for Research in Biomedicine, Università della Svizzera italiana, Bellinzona, Switzerland
7. Laboratory of Prion Biology, Department of Neuroscience, Scuola Internazionale Superiore Di Studi Avanzati (SISSA), Trieste, Italy
8. Department of Neurology, University Hospital of Basel, Basel, Switzerland
9. Department of Neurology, Inselspital, Bern University Hospital, University of Bern, Bern, Switzerland

\*Equally contributed to the paper

# Co-last authors

Correspondence to: Prof. Giorgia Melli Neurodegenerative Diseases Group, Laboratory for Translational Research, Ente Ospedaliero Cantonale, via Francesco Chiesa 5, 6500 Bellinzona, Switzerland E-mail:

[giorgia.melli@eoc.ch](mailto:giorgia.melli@eoc.ch) Tel: +41 (0)91 8116535; Fax: +41 (0)91 8116915

**Summary:**

Supplementary Table 1

Supplementary Table 2

Supplementary Figure 1

Supplementary Figure 2

**Supplementary Table 1**

|                     | Variable                      | HC<br>(n=14)  | TAU<br>(n=24)  | SYN<br>(n=20) | Overall<br>P-Value | TAU<br>vs HC | SYN<br>vs HC | TAU vs<br>SYN |
|---------------------|-------------------------------|---------------|----------------|---------------|--------------------|--------------|--------------|---------------|
| TauK18              | ThT End fluorescence Ankle    | 23114 ± 9794  | 109595 ± 24221 | 6862 ± 1385   | <b>0.000</b>       | <b>0.004</b> | 0.560        | <b>0.000</b>  |
|                     | ThT End fluorescence Cervical | 83394 ± 20072 | 112111 ± 24601 | 37739 ± 14526 | <b>0.039</b>       | 0.638        | 0.352        | <b>0.030</b>  |
|                     | Lag Time (h) Ankle            | 19.9 ± 1.1    | 14.1 ± 1.7     | 21.4 ± 0.6    | <b>0.000</b>       | <b>0.015</b> | 0.771        | <b>0.001</b>  |
|                     | Lag Time (h) Cervical         | 13.9 ± 1.8    | 12.3 ± 1.8     | 19.3 ± 1.3    | <b>0.011</b>       | 0.803        | 0.112        | <b>0.009</b>  |
|                     | T50 (h) Ankle                 | 20.4 ± 0.8    | 16.2 ± 1.5     | 22.0 ± 0.0    | <b>0.000</b>       | <b>0.034</b> | 0.615        | <b>0.001</b>  |
|                     | T50 (h) Cervical              | 16.4 ± 1.6    | 12.3 ± 1.7     | 20.2 ± 0.9    | <b>0.005</b>       | 0.364        | 0.236        | <b>0.003</b>  |
|                     | Seeding Score Ankle           | 0.02 ± 0.02   | 0.34 ± 0.08    | 0.0 ± 0.0     | <b>0.000</b>       | <b>0.004</b> | 0.969        | <b>0.001</b>  |
|                     | Seeding Score Cervical        | 0.16 ± 0.07   | 0.52 ± 0.10    | 0.11 ± 0.06   | <b>0.002</b>       | <b>0.024</b> | 0.932        | <b>0.003</b>  |
| Seeding Score Total | 0.11 ± 0.03                   | 0.42 ± 0.07   | 0.06 ± 0.03    | <b>0.000</b>  | <b>0.001</b>       | 0.855        | <b>0.000</b> |               |
| TauK19              | ThT End fluorescence Ankle    | 5086 ± 357    | 20051 ± 8515   | 12912 ± 3564  | 0.356              | 0.328        | 0.794        | 0.782         |
|                     | ThT End fluorescence Cervical | 6899 ± 1285   | 10894 ± 2664   | 10625 ± 1678  | 0.483              | 0.478        | 0.620        | 0.996         |
|                     | Lag Time (h) Ankle            | 24.0 ± 0.0    | 21.9 ± 0.9     | 22.5 ± 0.7    | 0.195              | 0.311        | 0.203        | 0.859         |
|                     | Lag Time (h) Cervical         | 24.0 ± 0.0    | 22.1 ± 0.7     | 22.5 ± 0.8    | 0.204              | 0.184        | 0.441        | 0.933         |
|                     | T50 (h) Ankle                 | 24.0 ± 0.0    | 21.9 ± 0.9     | 22.5 ± 0.7    | 0.195              | 0.311        | 0.203        | 0.859         |
|                     | T50 (h) Cervical              | 24.0 ± 0.0    | 24.0 ± 0.0     | 24.0 ± 0.0    | 1.000              | 1.000        | 1.000        | 1.000         |
|                     | Seeding Score Ankle           | 0.00 ± 0.00   | 0.12 ± 0.6     | 0.16 ± 0.7    | 0.178              | 0.237        | 0.218        | 0.946         |
|                     | Seeding Score Cervical        | 0.04 ± 0.03   | 0.20 ± 0.6     | 0.13 ± 0.06   | 0.264              | 0.235        | 0.665        | 0.805         |
| Seeding Score Total | 0.03 ± 0.02                   | 0.16 ± 0.05   | 0.15 ± 0.06    | 0.173         | 0.177              | 0.295        | 0.998        |               |

Kinetic parameters of TauK18 and TauK19 seeding activity at ankle and cervical in main groups. Variables are reported as mean ± SE. A P<0.05 was considered significant and shown in bold.

**Supplementary Table 2**

|        | Variable                   | HC<br>(n=14)     | PSP<br>(n=18)     | CBD<br>(n=6)      | PD<br>(n=14)    | MSA<br>(n=6)     | Overall<br>P-value | PSP vs<br>HC | CBD vs<br>HC | PD<br>vs HC | MSA<br>vs HC | PSP vs<br>CBD | PSP vs<br>PD | PSP vs<br>MSA | CBD vs<br>PD | CBD vs<br>MSA | PD vs<br>MSA |
|--------|----------------------------|------------------|-------------------|-------------------|-----------------|------------------|--------------------|--------------|--------------|-------------|--------------|---------------|--------------|---------------|--------------|---------------|--------------|
| TauK18 | ThT End fluor.<br>Ankle    | 23114 ±<br>9794  | 113535 ±<br>29659 | 97773<br>±44513   | 5632<br>±816    | 9733 ±<br>4233   | <b>0.002</b>       | <b>0.022</b> | 0.334        | 0.978       | 0.997        | 0.993         | <b>0.004</b> | 0.063         | 0.150        | 0.337         | 0.999        |
|        | ThT End fluor.<br>Cervical | 83394 ±<br>20072 | 114312 ±<br>28864 | 105506 ±<br>51244 | 17494 ±<br>9939 | 84976 ±<br>37892 | 0.074              | 0.886        | 0.988        | 0.354       | 0.999        | 0.999         | <b>0.042</b> | 0.936         | 0.320        | 0.995         | 0.585        |
|        | Lag Time (h)<br>Ankle      | 19.9 ± 1.1       | 13.9 ± 2.1        | 14.6 ± 3.3        | 21.9 ± 0.1      | 21.0 ± 1.9       | <b>0.004</b>       | 0.057        | 0.384        | 0.903       | 0.999        | 0.999         | <b>0.004</b> | 0.228         | 0.110        | 0.537         | 0.965        |
|        | Lag Time (h)<br>Cervical   | 13.9 ± 1.8       | 12.2 ± 2.1        | 12.8 ± 4.1        | 20.5 ± 1.2      | 16.3 ± 3.0       | <b>0.037</b>       | 0.965        | 0.998        | 0.157       | 0.966        | 0.999         | <b>0.024</b> | 0.772         | 0.238        | 0.929         | 0.718        |
|        | T50 (h)<br>Ankle           | 20.4 ± 0.8       | 15.8 ± 1.7        | 17.7 ± 2.8        | 22.0 ± 0.0      | 22.0 ± 0.0       | <b>0.006</b>       | 0.095        | 0.656        | 0.911       | 0.936        | 0.984         | <b>0.009</b> | 0.082         | 0.270        | 0.437         | 0.999        |
|        | T50 (h)<br>Cervical        | 16.4 ± 1.6       | 13.3 ± 1.9        | 13.3 ± 3.8        | 20.8 ± 1.1      | 18.7 ± 1.7       | <b>0.028</b>       | 0.704        | 0.888        | 0.413       | 0.956        | 0.999         | <b>0.022</b> | 0.451         | 0.169        | 0.653         | 0.963        |
|        | Seeding Score<br>Ankle     | 0.02 ±<br>0.02   | 0.37 ±<br>0.10    | 0.28 ±<br>0.18    | 0.00 ±<br>0.00  | 0.00 ±<br>0.00   | <b>0.002</b>       | <b>0.012</b> | 0.380        | 0.999       | 0.999        | 0.959         | <b>0.006</b> | 0.063         | 0.292        | 0.461         | 0.999        |
|        | Seeding Score<br>Cervical  | 0.16 ±<br>0.07   | 0.53 ±<br>0.11    | 0.50 ±<br>0.22    | 0.07 ±<br>0.07  | 0.22 ±<br>0.16   | <b>0.013</b>       | 0.086        | 0.439        | 0.970       | 0.998        | 0.999         | <b>0.016</b> | 0.464         | 0.200        | 0.751         | 0.939        |
|        | Seeding Score<br>Total     | 0.11 ±<br>0.03   | 0.44 ±<br>0.08    | 0.38 ±<br>0.13    | 0.04 ±<br>0.04  | 0.12 ±<br>0.08   | <b>0.000</b>       | <b>0.005</b> | 0.192        | 0.946       | 0.999        | 0.986         | <b>0.000</b> | 0.065         | 0.055        | 0.383         | 0.966        |
| TauK19 | ThT End fluor.<br>Ankle    | 5086 ±<br>357    | 23183 ±<br>11183  | 10657 ±<br>5913   | 14017 ±<br>6521 | 11806 ±<br>3967  | 0.591              | 0.488        | 0.995        | 0.975       | 0.992        | 0.906         | 0.968        | 0.932         | 0.999        | 0.999         | 0.999        |
|        | ThT End fluor.<br>Cervical | 6899 ±<br>1285   | 12373 ±<br>3479   | 6456 ±<br>1363    | 10850 ±<br>2652 | 10400 ±<br>2311  | 0.555              | 0.564        | 0.999        | 0.928       | 0.953        | 0.718         | 0.997        | 0.993         | 0.940        | 0.958         | 0.999        |
|        | Lag Time (h)<br>Ankle      | 24.0 ± 0.0       | 22.5 ± 0.8        | 22.2 ± 1.8        | 21.8 ± 1.5      | 22.1 ± 0.8       | 0.517              | 0.689        | 0.776        | 0.588       | 0.708        | 0.999         | 0.939        | 0.997         | 0.998        | 0.999         | 0.999        |
|        | Lag Time (h)<br>Cervical   | 24.0 ± 0.0       | 21.7 ± 0.9        | 24.0 ±<br>0.0     | 23.1 ± 0.9      | 21.7 ± 1.5       | 0.154              | 0.187        | 0.999        | 0.970       | 0.497        | 0.4323        | 0.822        | 0.999         | 0.983        | 0.644         | 0.915        |
|        | T50 (h)<br>Ankle           | 24.0 ± 0.0       | 22.5 ± 0.8        | 22.2 ± 1.8        | 21.8 ± 1.5      | 22.1 ± 0.8       | 0.517              | 0.689        | 0.776        | 0.588       | 0.708        | 0.999         | 0.939        | 0.997         | 0.998        | 0.999         | 0.999        |
|        | T50 (h)<br>Cervical        | 24.0 ± 0.0       | 24.0 ± 0.0        | 24.0 ± 0.0        | 24.0 ± 0.0      | 24.0 ± 0.0       | 1.000              | 1.000        | 1.000        | 1.000       | 1.000        | 1.000         | 1.000        | 1.000         | 1.000        | 1.000         | 1.000        |
|        | Seeding Score<br>Ankle     | 0.00 ±<br>0.00   | 0.15 ±<br>0.07    | 0.11 ±<br>0.11    | 0.22 ±<br>0.11  | 0.12 ±<br>0.12   | 0.394              | 0.418        | 0.894        | 0.382       | 0.894        | 0.997         | 0.970        | 0.997         | 0.937        | 0.999         | 0.937        |
|        | Seeding Score<br>Cervical  | 0.04 ±<br>0.03   | 0.24 ±<br>0.08    | 0.05 ±<br>0.05    | 0.10 ±<br>0.06  | 0.17 ±<br>0.11   | 0.741              | 0.514        | 0.999        | 0.982       | 0.982        | 0.780         | 0.964        | 0.964         | 0.994        | 0.994         | 0.999        |
|        | Seeding Score<br>Total     | 0.03 ±<br>0.02   | 0.19 ±<br>0.06    | 0.08 ±<br>0.05    | 0.16 ±<br>0.05  | 0.15 ±<br>0.11   | 0.336              | 0.266        | 0.987        | 0.689       | 0.788        | 0.830         | 0.999        | 0.995         | 0.960        | 0.982         | 0.999        |

Kinetic parameters of TauK18 and TauK19 seeding activity at ankle and cervical sites in disease sub-groups. Variables are reported as mean ± SE. A P<0.05 was considered significant and shown in bold.

### Supplementary Figure 1

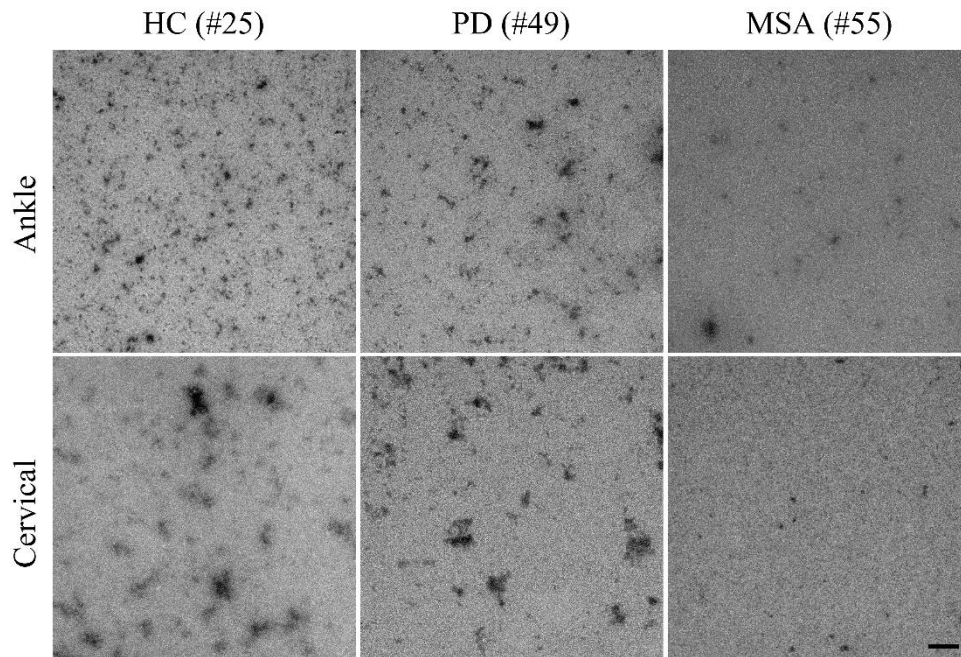

TEM images of TauK18-SAA end-products from ankle and cervical sites from HC, PD, and MSA subjects. Scale bar 100nm.

### Supplementary Figure 2

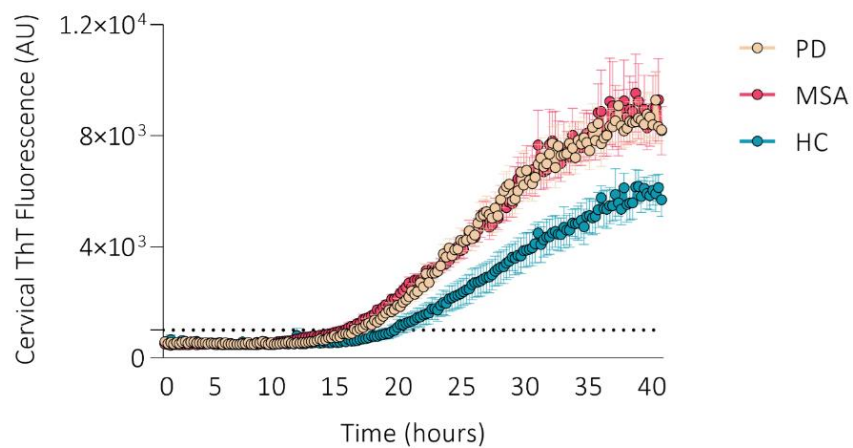

Kinetic curves of Alpha-Synuclein seeding activity in cervical sites. Each dot represents the mean ( $\pm$ SE) of the ThT fluorescence intensity of all samples tested per group against time.
